# Supplementary material
Source: PubMed Central journal article supplement (PMC3957925)
Supplement: JVI.03428-13_zjv999098774so1.pdf [file JVI.03428-13_zjv999098774so1.pdf]

## Supplemental tables

|         | Total<br>estimated<br>parameters | $a$ | $\beta$ | $c$ | $\delta$ | $\gamma$ | $k$ | $\lambda$ | $n$ | $m$ | $\theta$ | $p$ |
|---------|----------------------------------|-----|---------|-----|----------|----------|-----|-----------|-----|-----|----------|-----|
| Model 1 | 6                                | -   | E       | 23  | E        | -        | E   | 0.5       | -   | -   | E        | E   |
| Model 2 | 7                                | E   | E       | 23  | E        | -        | E   | 0.5       | E   | -   | E        | E   |
| Model 3 | 7                                | -   | E       | 23  | E        | -        | E   | 0.5       | -   | -   | E        | E   |
| Model 4 | 8                                | E   | E       | 23  | E        | -        | E   | 0.5       | E   | -   | E        | E   |
| Model 5 | 7                                | -   | E       | 23  | E        | E        | E   | 0.5       | -   | E   | E        | E   |

Table S1: Parameter values. Values that were estimated for each model are marked with an E.

|           | Model 1 | Model 2 | Model 3 ( $\beta$ ) | Model 3 ( $\delta$ ) | Model 3 ( $k$ ) | Model 4 ( $\beta$ ) | Model 4 ( $\delta$ ) | Model 4 ( $k$ ) | Model 5 |
|-----------|---------|---------|---------------------|----------------------|-----------------|---------------------|----------------------|-----------------|---------|
| Exp. 1    | 8.51    | 2.76    | 12.69               | 13.77                | 15.67           | 7.45                | 11.02                | 11.08           | 17.44   |
| Exp. 2    | 10.57   | 3.08    | 12.81               | 14.41                | 13.78           | 7.39                | 11.63                | 11.90           | 15.72   |
| Exp. 3    | 7.67    | -1.49   | 11.52               | 12.52                | 14.18           | 1.20                | 2.50                 | 5.74            | 14.23   |
| Control 1 | 7.71    | 10.37   | 15.56               | 15.04                | 21.47           | 16.47               | 24.01                | 23.95           | 29.42   |
| Control 2 | 11.12   | 14.26   | 18.31               | 17.45                | 22.76           | 20.11               | 27.67                | 27.66           | 30.02   |

Table S2: Akaike Information Criteria scores. A lower AIC value corresponds to a better description of the data by the given model, statistically speaking.

|                  | Exp. 1   | Exp. 2   | Exp. 3   | Control 1 | Control 2 | Mean     |
|------------------|----------|----------|----------|-----------|-----------|----------|
| Fit to Exp. 1    | 6.55e-03 | 1.71e-02 | 1.84e-02 | 1.25e-02  | 1.62e-02  | 1.42e-02 |
| Fit to Exp 2     | 7.04e-03 | 1.97e-02 | 1.92e-02 | 1.45e-02  | 1.85e-02  | 1.58e-02 |
| Fit to Exp 3     | 4.60e-03 | 1.31e-02 | 1.38e-02 | 9.63e-03  | 1.23e-02  | 1.07e-02 |
| Fit to Control 1 | 1.26e-02 | 3.07e-02 | 3.63e-02 | 2.53e-02  | 2.90e-02  | 2.68e-02 |
| Fit to Control 2 | 3.55e-03 | 8.96e-03 | 7.22e-03 | 6.58e-03  | 7.52e-03  | 6.76e-03 |

Table S3: Fitted values obtained for the proportion  $p$  of SHIV measured in peripheral blood produced by CD4+ T-cells in blood. For each row of the table, Model 2 was individually fit to that particular animal. Then, we carried forward all the parameters obtained through this fit and fit only to parameter  $p$ . For example, when fitting to Control 2, we obtained that the value of  $p$  for Experiment 1 is  $p = 3.55e-03$ .

## Supplemental figures

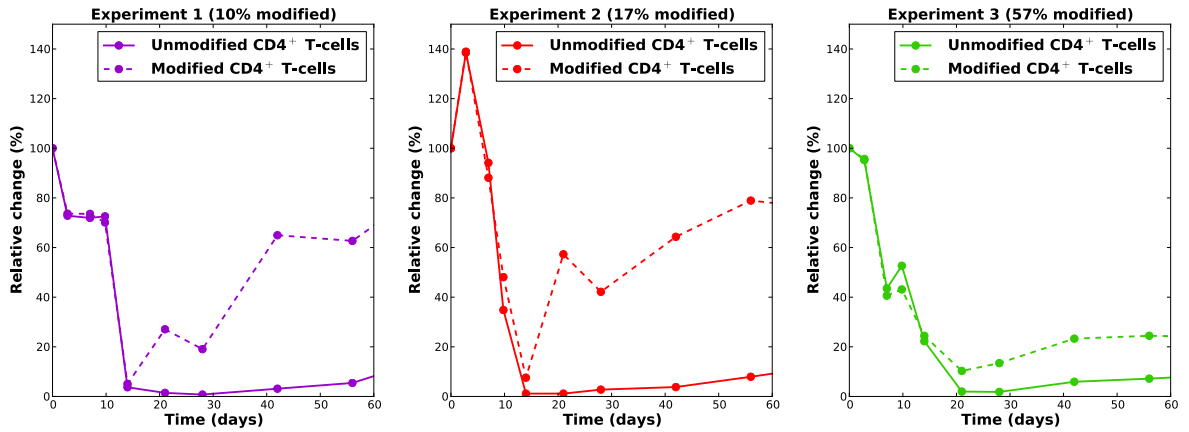

Figure S1: Relative change of CD4<sup>+</sup> T-cells in the experimental monkeys. The graphs compare the number of CD4<sup>+</sup> T-cells at different time points with respect with the number of CD4<sup>+</sup> T-cells on the day of viral inoculation, as a relative percentage. A) Experiment 1, with 10% gene-modified cells. B) Experiment 2, with 17% gene-modified cells. C) Experiment 3, with 57% gene-modified cells

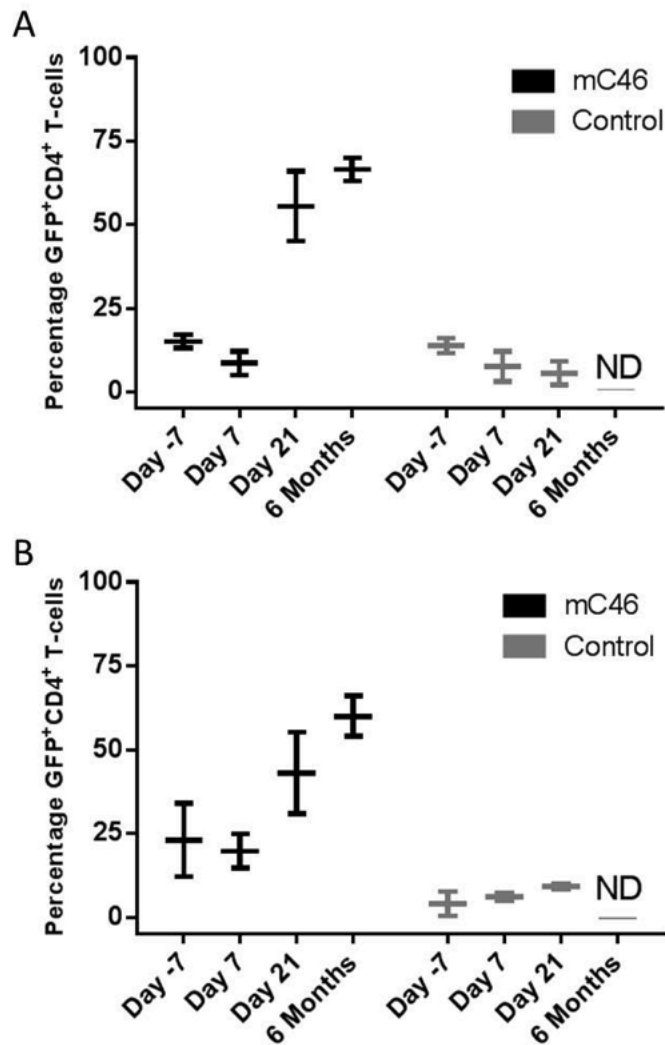

Figure S2: Positive selection of mC46-expressing CD4<sup>+</sup> T-cells following SHIV-challenge. (A and B) The percentage of genetically modified cells was determined in (A) GI and (B) LN biopsies harvested at Day(-) 7, Day 7, Day 21 and 6 months following SHIV-challenge. Following gating on CD3<sup>+</sup> T-lymphocytes, CD4<sup>+</sup> T-cell versus GFP<sup>+</sup> cells was determined. ND: Not detected. This research was originally published in Blood. Younan et al. Positive selection of mC46-expressing CD4<sup>+</sup> T cells and maintenance of virus specific immunity in a primate AIDS model. Blood. 2013;122 (2):179-87. © the American Society of Hematology.

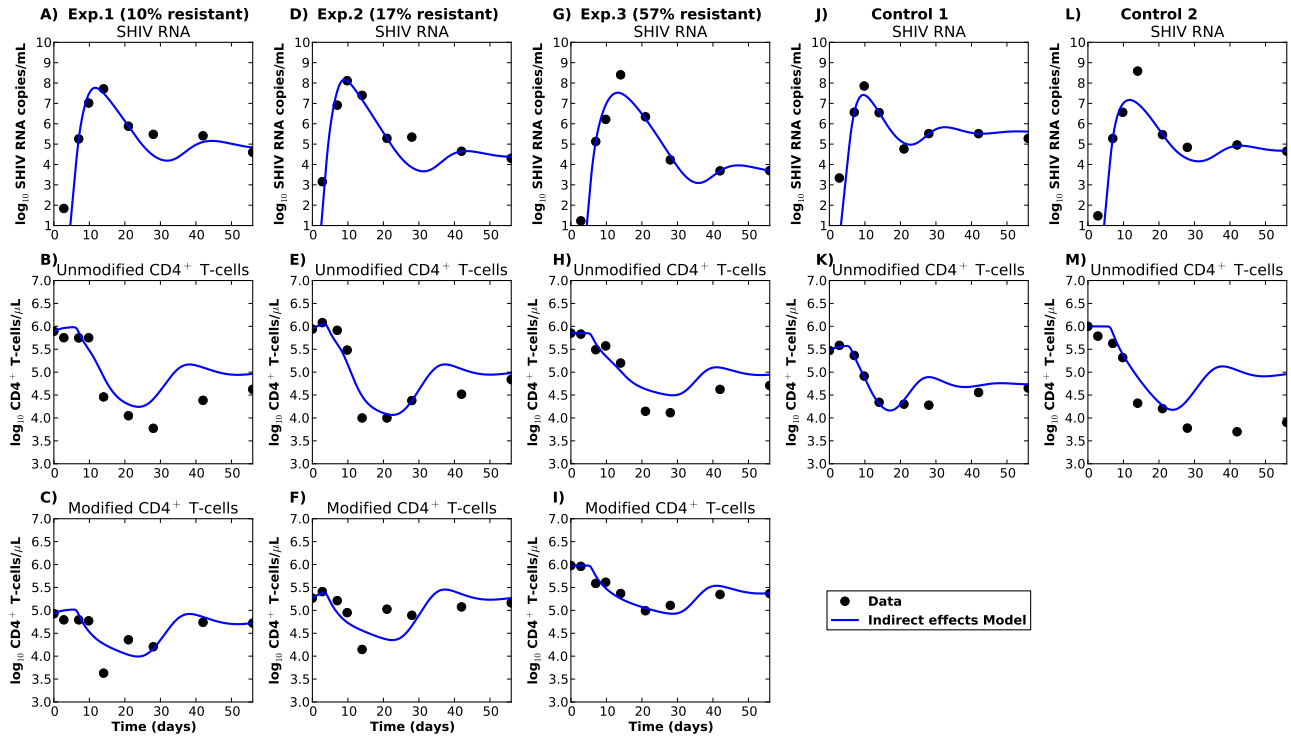

Figure S3: Best-fit trajectories (solid lines) using Model 2 and experimentally observed data (●) for the experimental and control animals. Here, the indirect effects model was fit with 7 unknown parameters for each animal individually. (A-C) Experiment 1, with 10% modified cells prior to infection. (D-F) Experiment 2, with 17% modified cells prior to infection. (G-I) Experiment 3, with 55% modified cells prior to infection. (J-K) Control 1. (L-M) Control 2.

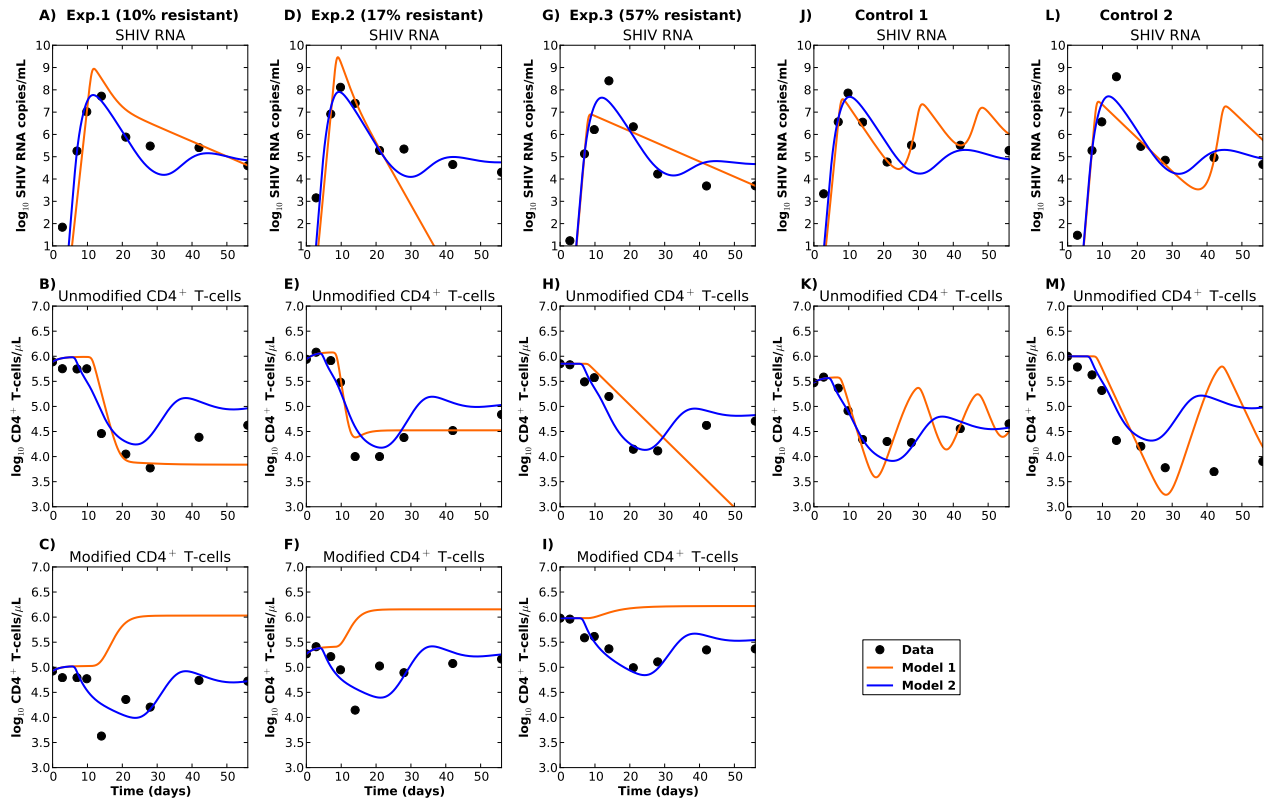

Figure S4: Best-fit trajectories (solid lines) for Model 1 (orange) and Model 2 (blue) and experimentally observed data (●) for the experimental and control animals. (A-C) Experiment 1, with 10% modified cells prior to infection. (D-F) Experiment 2, with 17% modified cells prior to infection. (G-I) Experiment 3, with 55% modified cells prior to infection. (J-K) Control 1. (L-M) Control 2. Here, each monkey was fit individually.

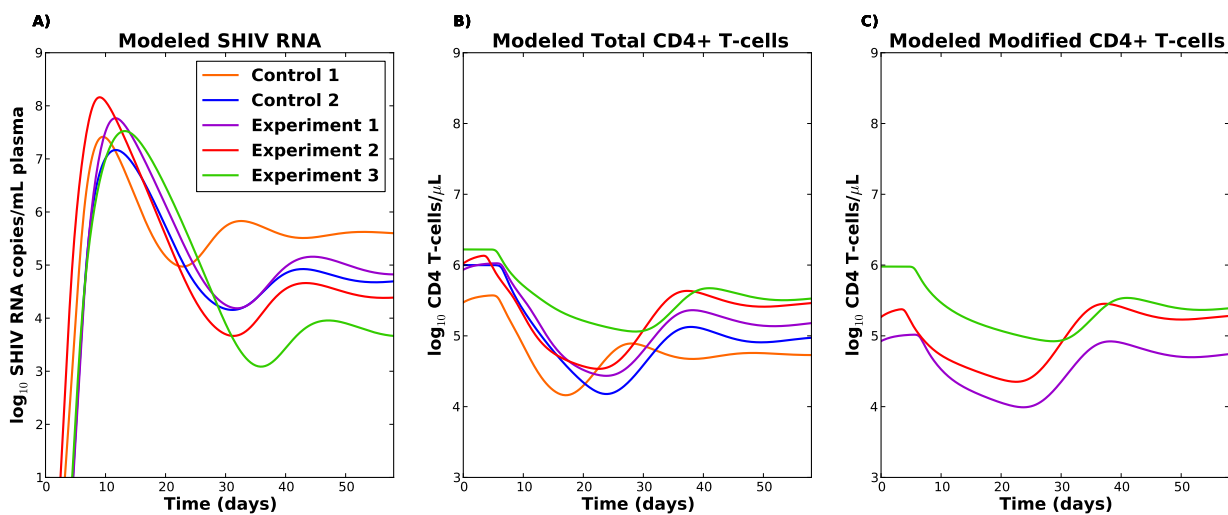

Figure S5: Modeled viral load and CD4+ T-cell trajectories using the individual fits of the “Indirect effects model” (Model 2). Here, Model 2 was fit with 7 unknown parameters for each animal individually. A) Modeled viral loads for the five macaques. B) Modeled total CD4 T-cell counts for the five macaques. C) Modeled modified CD4+ T-cell counts for the experimental macaques.

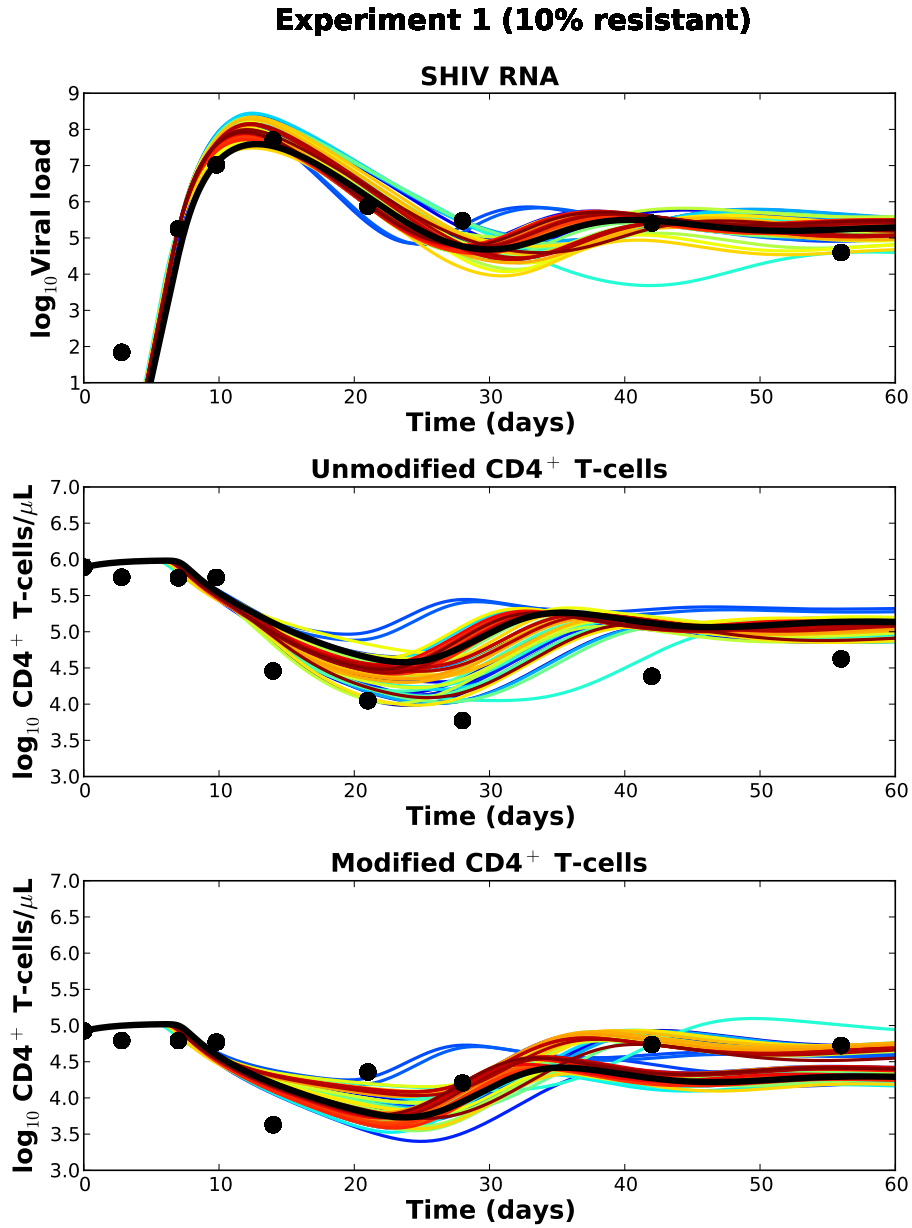

Figure S6: Numerical simulations (solid lines) and experimentally observed data (●) for Experiment 1 (10% of  $CD4^+$  T-cells modified). All the solutions obtained for the Indirect effects Model (Model 2) are plotted, and the black solid line represents the median parameter set.



### Experiment 2 (17% resistant)

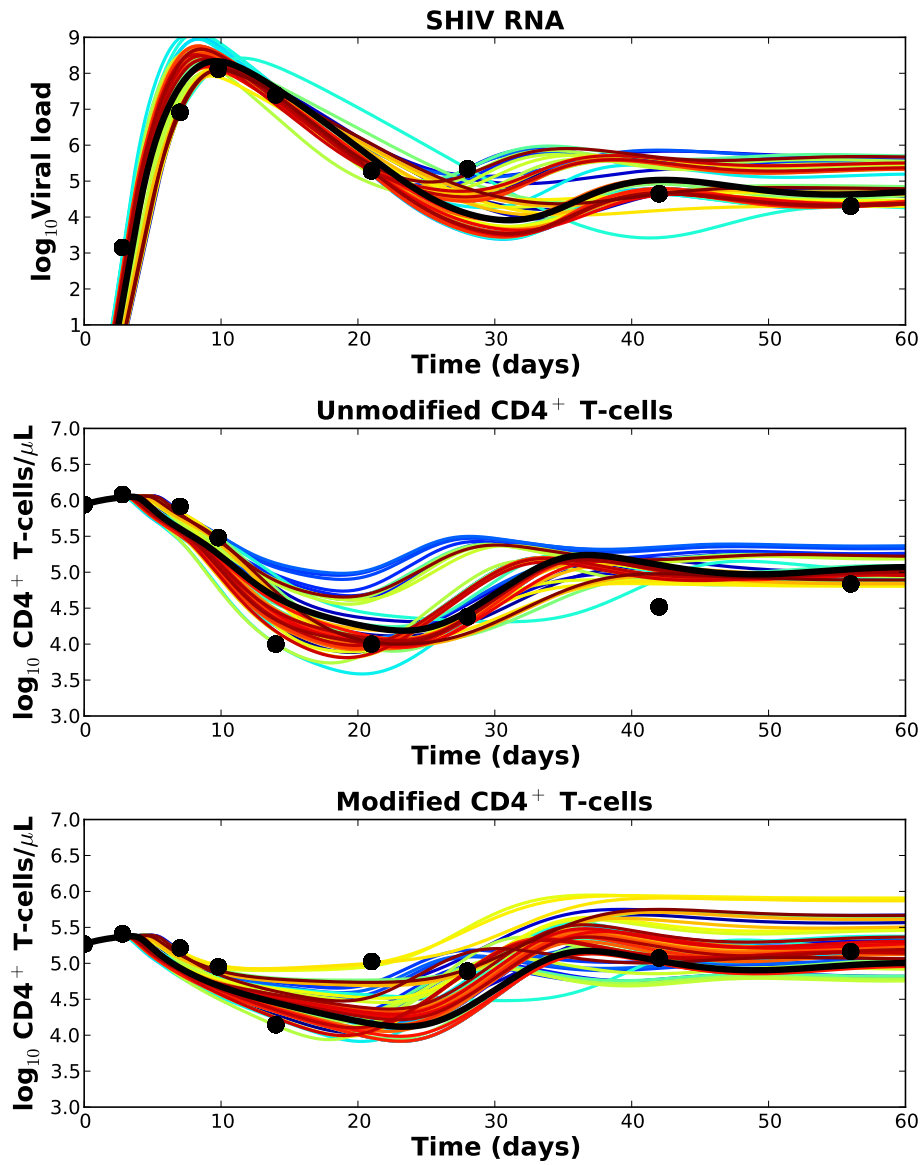

Figure S7: Numerical simulations (solid lines) and experimentally observed data (●) for Experiment 2 (17% of CD4<sup>+</sup> T-cells modified). All the solutions obtained for the Indirect effects Model (Model 2) are plotted, and the black solid line represents the median parameter set.

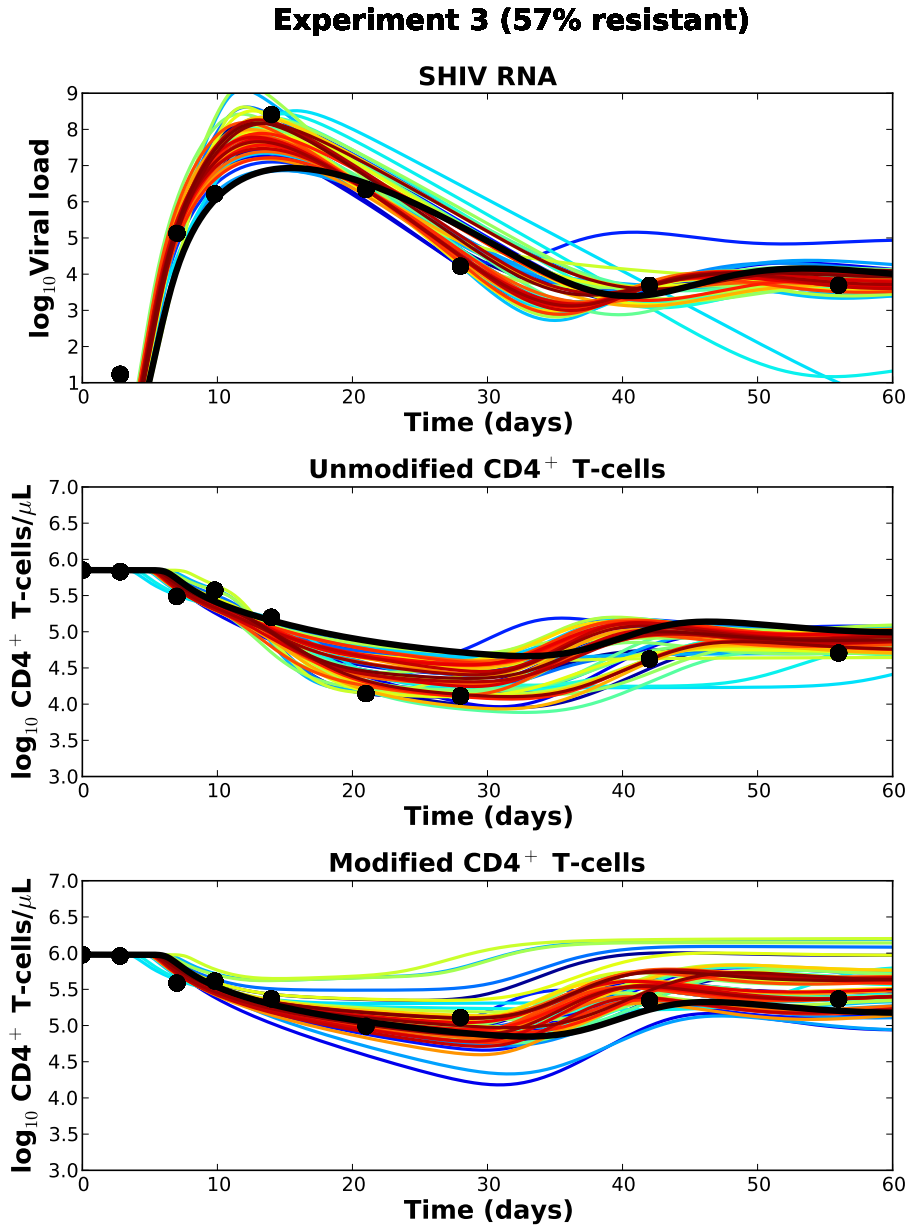

Figure S8: Numerical simulations (solid lines) and experimentally observed data (●) for Experiment 3 (57% of CD4<sup>+</sup> T-cells modified). All the solutions obtained for the Indirect effects Model (Model 2) are plotted, and the black solid line represents the median parameter set.

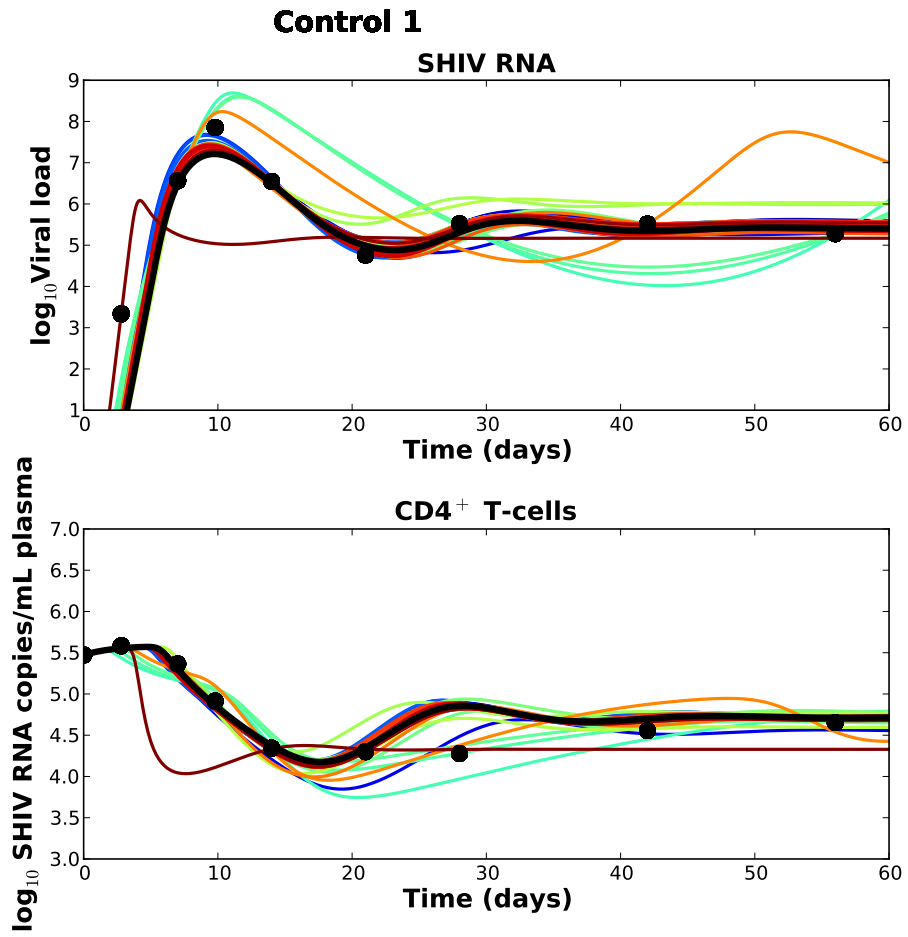

Figure S9: Numerical simulations (solid lines) and experimentally observed data (●) for Control 1. All the solutions obtained for the “Indirect effects Model” (Model 2) are plotted, and the black solid line represents the median parameter set.

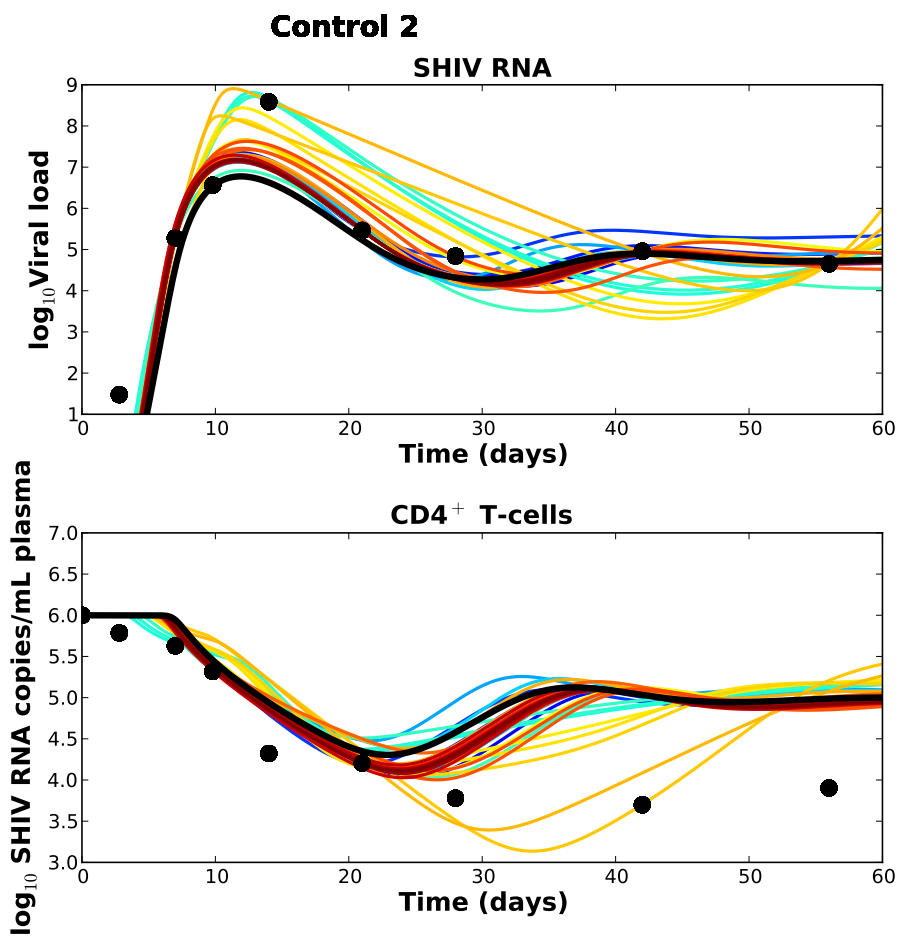

Figure S10: Numerical simulations (solid lines) and experimentally observed data (●) for Control 2. All the solutions obtained for the Indirect effects Model (Model 2) are plotted, and the black solid line represents the median parameter set.

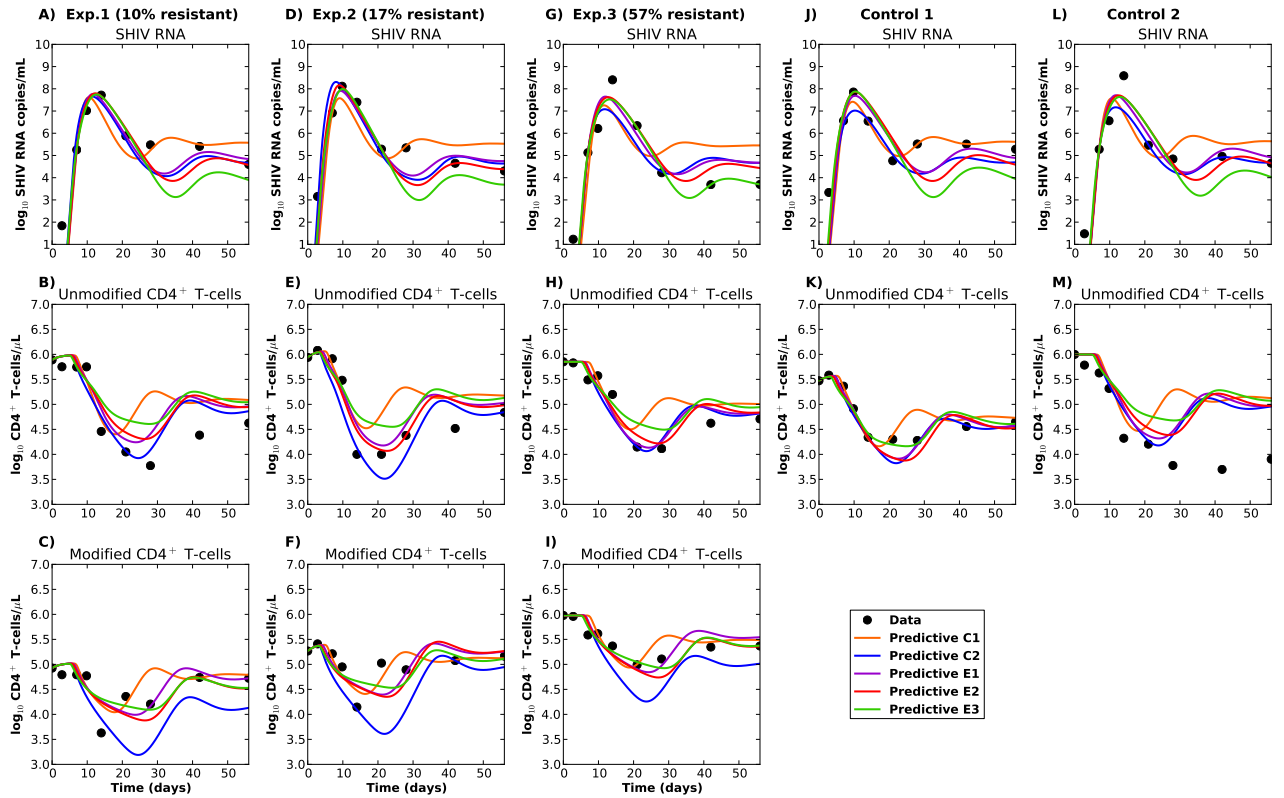

Figure S11: Best-fit trajectories (solid lines) for Model 2 and experimentally observed data (●) for the experimental and control animals. (A-C) Experiment 1, with 10% modified cells prior to infection. (D-F) Experiment 2, with 17% modified cells prior to infection. (G-I) Experiment 3, with 55% modified cells prior to infection. (J-K) Control 1. (L-M) Control 2. Here, each monkey was fit individually. Then, all the parameters obtained for that monkey were carried forward except for parameter  $p$ , the proportion of SHIV produced by CD4<sup>+</sup> T-cells in blood, which was estimated for the remaining monkeys individually. Orange: best fits for all the monkeys using the parameters from Control 1 and fitting to  $p$  only. Blue: best fits for all the monkeys using the parameters from Control 2 and fitting to  $p$  only. Purple: best fits for all the monkeys using the parameters from E1 and fitting to  $p$  only. Red: best fits for all the monkeys using the parameters from E2 and fitting to  $p$  only. Green: best fits for all the monkeys using the parameters from E3 and fitting to  $p$  only.

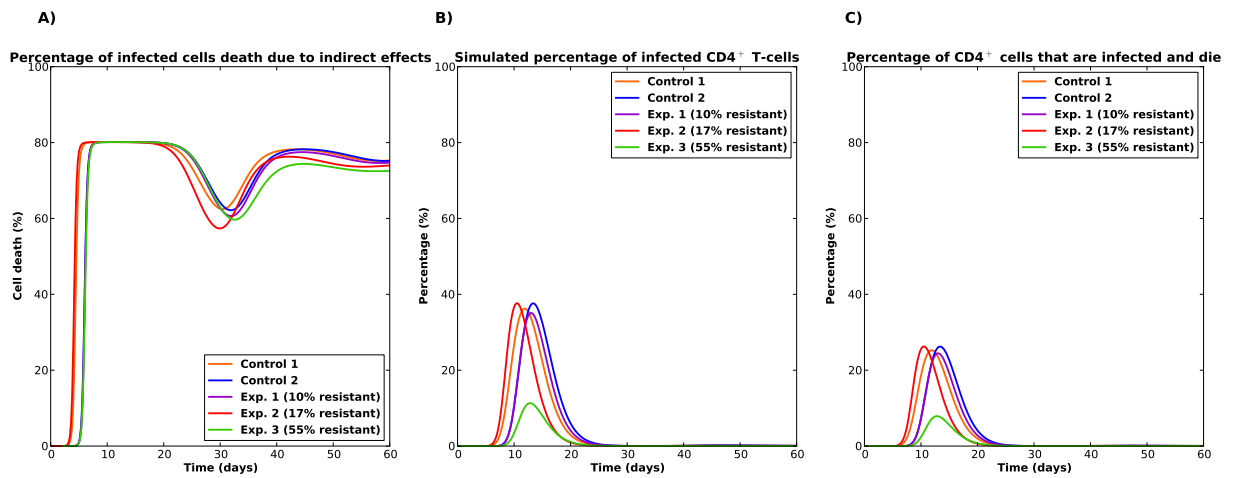

Figure S12: A) Modeled percentage of daily cell-death occurring in the infected compartment due to indirect effects. B) Simulated percentage of infected CD4<sup>+</sup> T-Cells during the course of a SHIV infection. C) Simulated percentage of CD4<sup>+</sup> T-cells that will become infected and die during the course of a SHIV infection. Here, the parameters obtained by fitting to Experiment 1 were carried over and only the proportion of SHIV produced by CD4<sup>+</sup> T-cells in blood (parameter  $p$ ) was fit to the other animals.

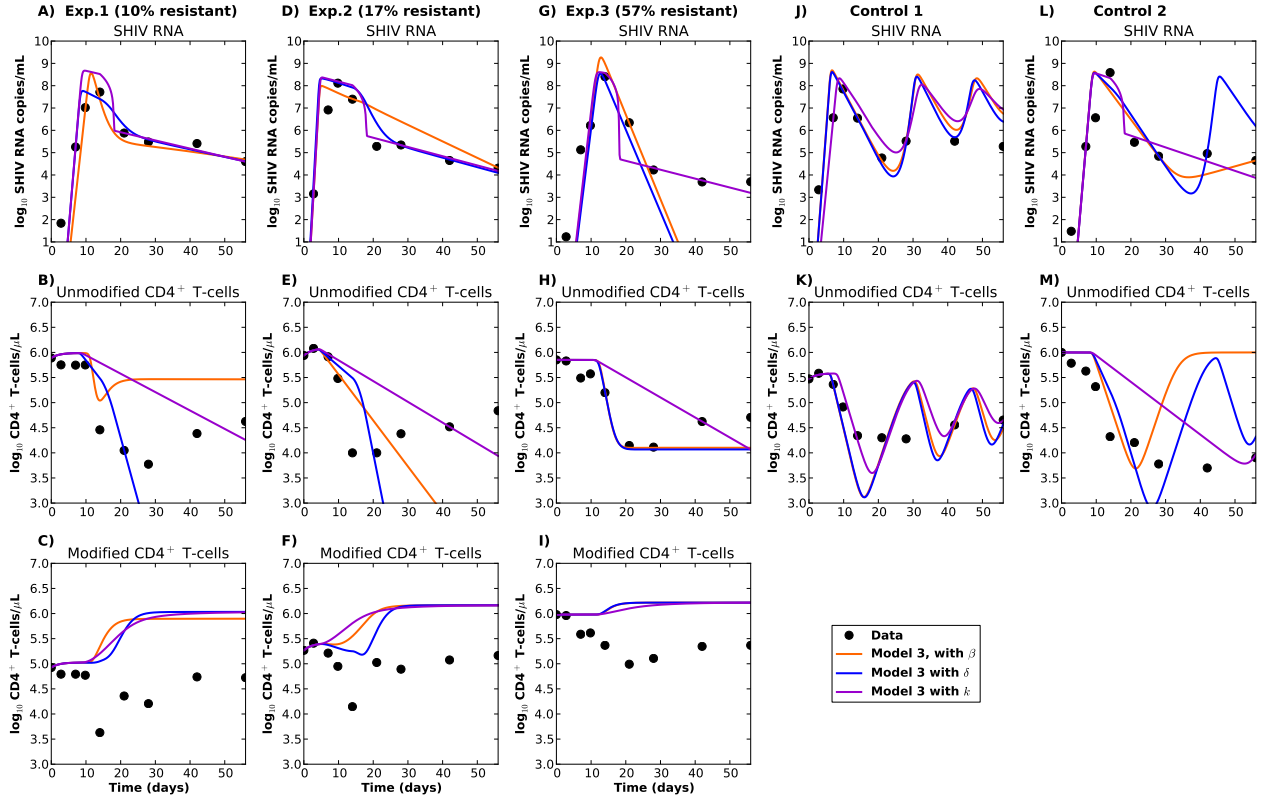

Figure S13: Best-fit trajectories (solid lines) for Model 3 and experimentally observed data (●) for the experimental and control animals. (A-C) Experiment 1, with 10% modified cells prior to infection. (D-F) Experiment 2, with 17% modified cells prior to infection. (G-I) Experiment 3, with 55% modified cells prior to infection. (J-K) Control 1. (L-M) Control 2. Model 3 is similar to Model 1 but it includes a phasing immunity (eq. 3). We assumed immunity could be modeled in three different ways: by decreasing infectivity  $\beta$  (orange), by increasing the infected-cell death rate  $\delta$  (blue), or by decreasing the burst size  $k$  (purple). Here, each monkey was fit individually.

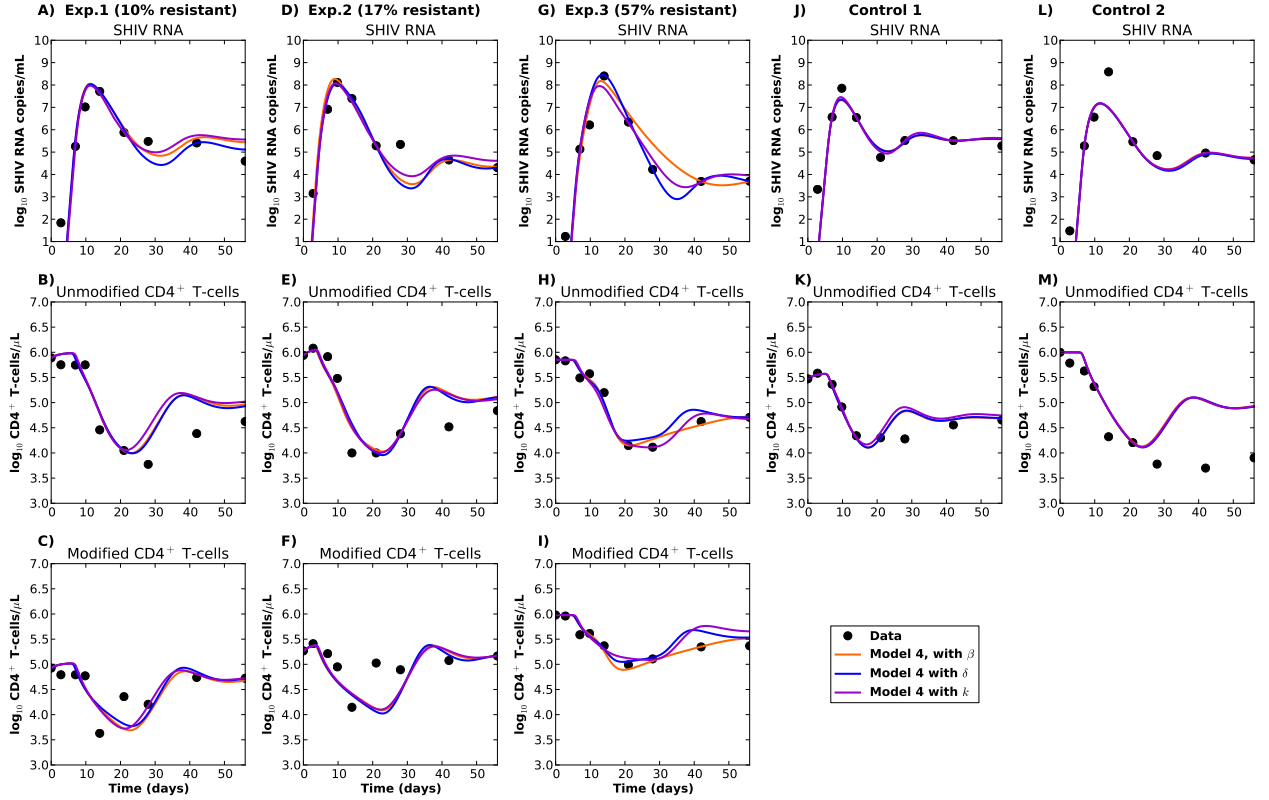

Figure S14: fBest-fit trajectories (solid lines) for Model 4 and experimentally observed data (●) for the experimental and control animals. (A-C) Experiment 1, with 10% modified cells prior to infection. (D-F) Experiment 2, with 17% modified cells prior to infection. (G-I) Experiment 3, with 55% modified cells prior to infection. (J-K) Control 1. (L-M) Control 2. Model 4 is similar to Model 2 but it includes a phasing immunity (eq. 4). We assumed immunity could be modeled in three different ways: by decreasing infectivity  $\beta$  (orange), by increasing the infected-cell death rate  $\delta$  (blue), or by decreasing the burst size  $k$  (purple). Here, each monkey was fit individually.



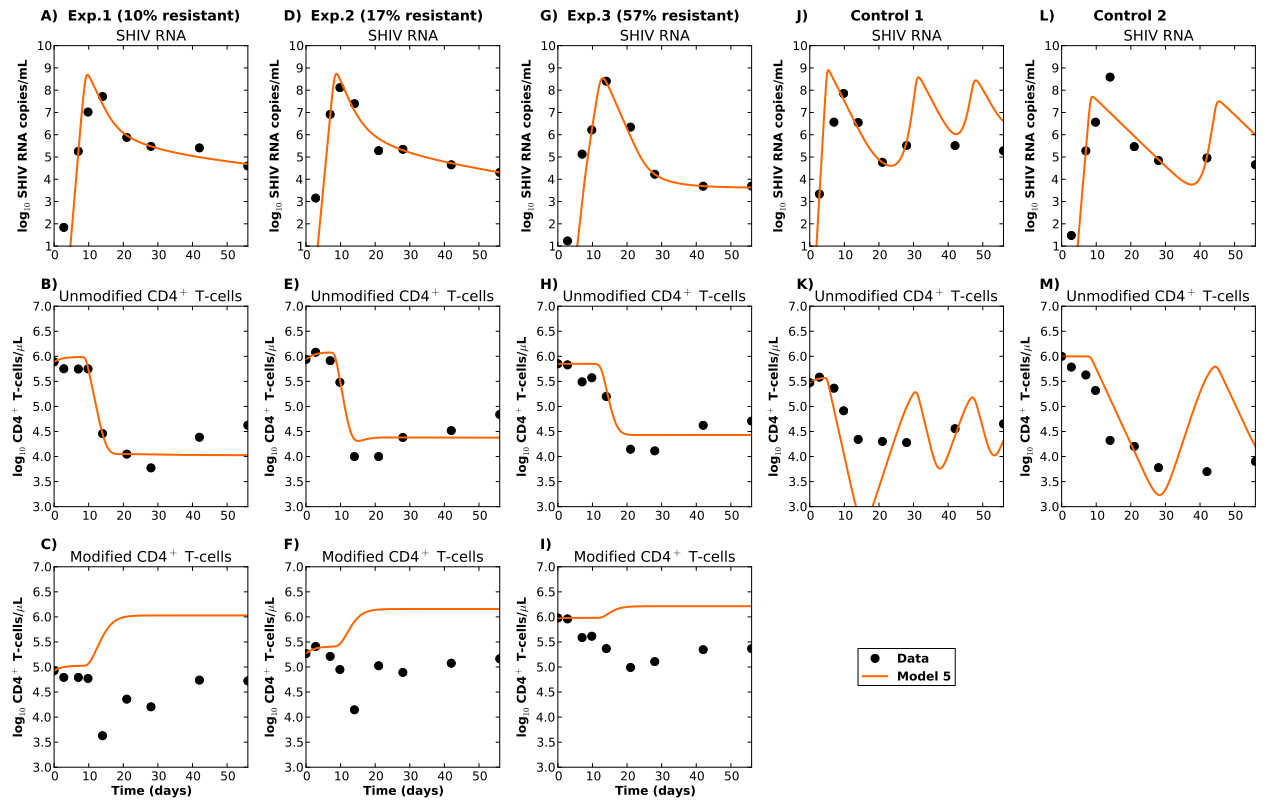

Figure S15: Best-fit trajectories (solid lines) for Model 5 and experimentally observed data (●) for the experimental and control animals. (A-C) Experiment 1, with 10% modified cells prior to infection. (D-F) Experiment 2, with 17% modified cells prior to infection. (G-I) Experiment 3, with 55% modified cells prior to infection. (J-K) Control 1. (L-M) Control 2. Here, each monkey was fit individually.
